# Supplementary material for: Transcriptomics Analysis of Tomato Ripening Regulated by Carbon Dioxide
Source: MDPI journal article supplement (doi:10.3390/sci5030026), 2023-06-30
Supplement: s1 [file s1]

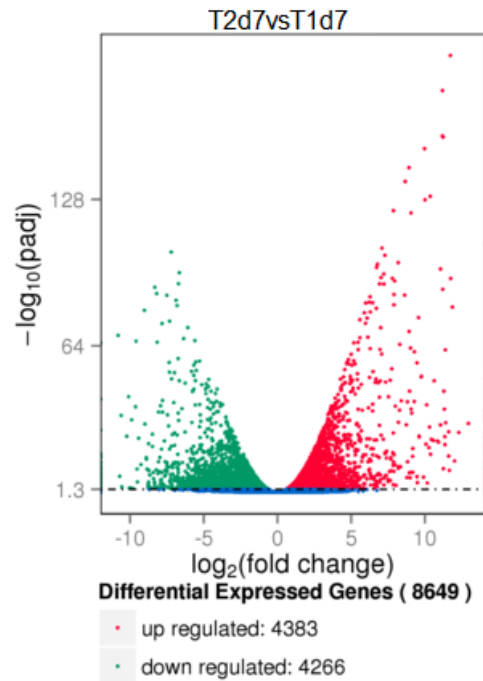

Figure S1: A volcano plot of significant DGE numbers of CO<sub>2</sub>-treated tomatoes on day 7, T1:T2.

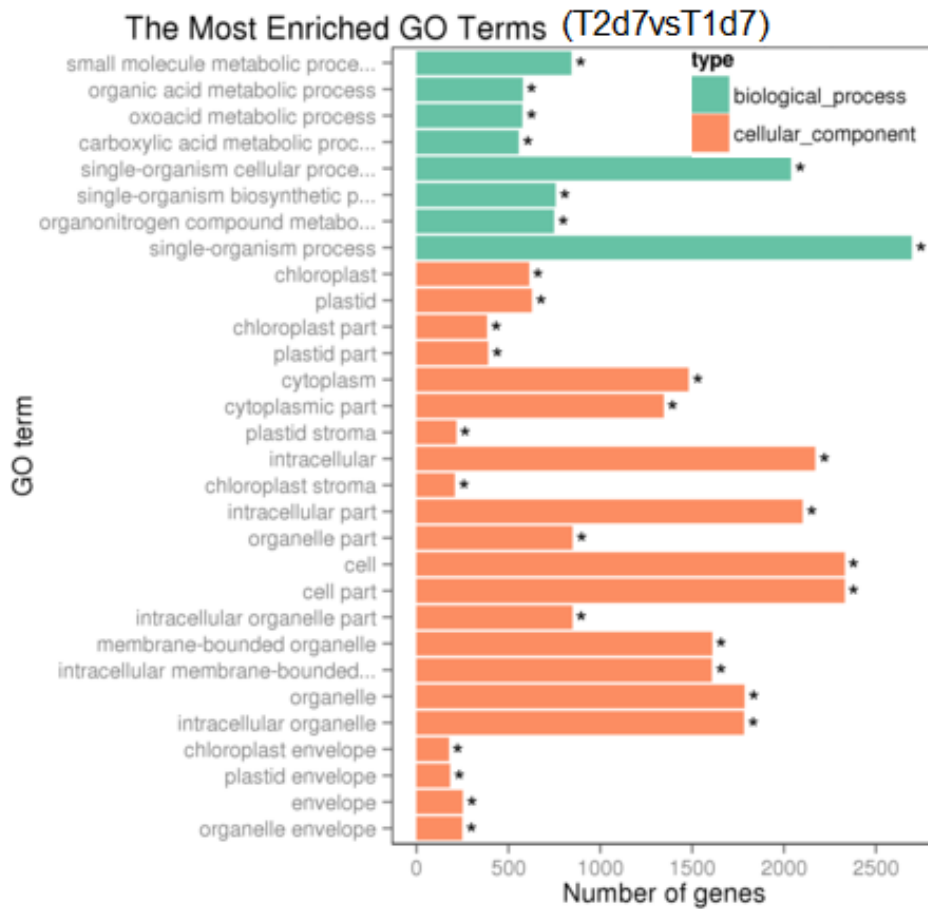

Figure S2: The most enriched GO terms in T1 vs. T2 on d7. Asterisks (\*) indicate  $q < 0.05$ .

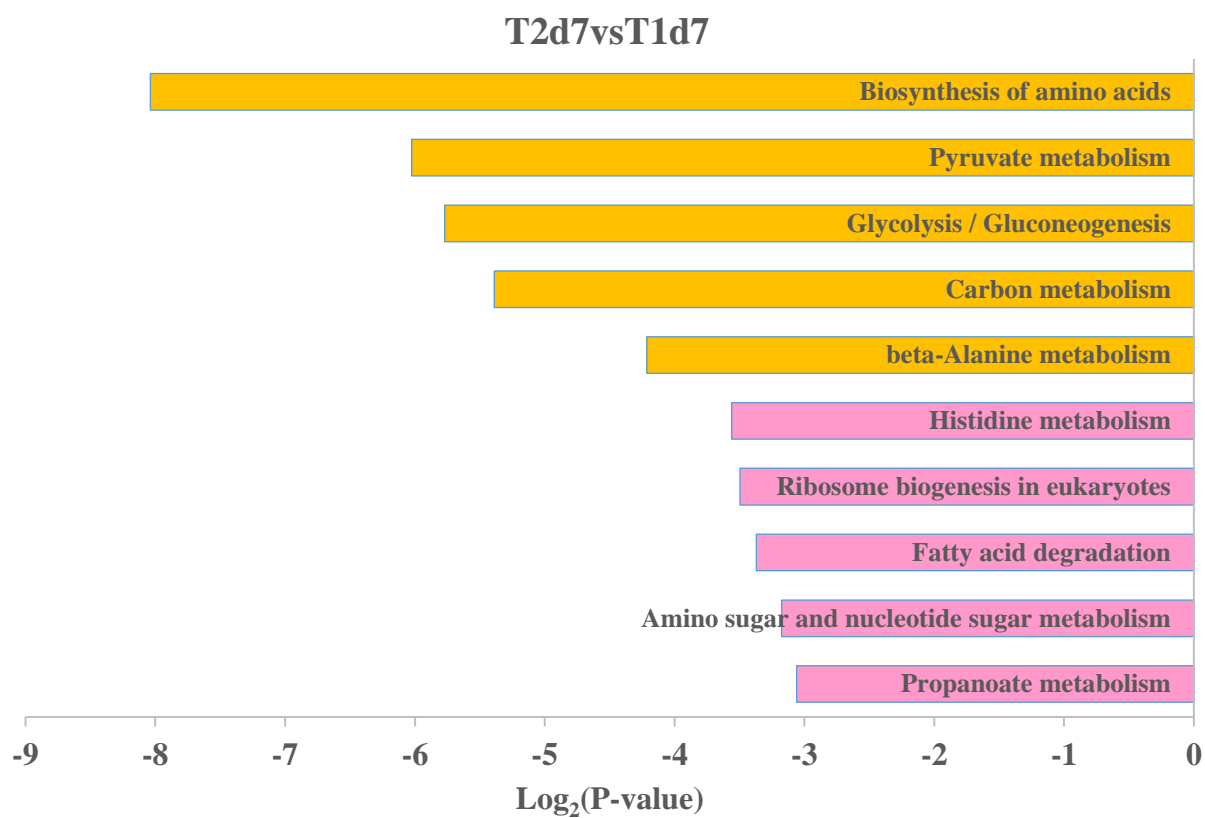

Figure S3: KEGG pathway analysis of T2 vs. T1 on d7; brown bars,  $q < 0.05$ ,  $p < 0.05$ ; pink bars,  $q < 0.05$ ,  $p > 0.05$ .

Table S1: Primer sequences used in q-PCR assays.

| Sequence Description | FWD                   | REV                    |
|----------------------|-----------------------|------------------------|
| Solyc02g061770.2     | ATCAATGGTGGAATGGAATG  | TACCAGGATCAACTCCCAA    |
| Solyc02g076710.2     | CCAACGAAAGAATCATCACC  | TGTTTGGTCTCCTGGACAGT   |
| Solyc12g099160.1     | GCCAGTATACGAAAGGCTCA  | GAGCTTCAACGCAGTCTCTC   |
| Solyc03g115220.2     | CCATTGCAGAGCTTATTCGT  | CCAGGTCAGATTCCATAACG   |
| Solyc08g005050.2     | GCTCATGGAGGAGAACAGA   | AAGATCACACCCGAAACAAA   |
| Solyc03g120420.2     | AGGATGCCTTTATGCTTGTG  | GTAACACAGGGTTGGCATGT   |
| Solyc10g083440.1     | TTTGTAAACGCATTGTGGATG | TCCAAACACTTTCCACCATT   |
| Solyc10g075070.1     | GAGGGTGTGTGCTGGAGTT   | AGGAATGCTTACGCCACAAG   |
| Solyc09g008830.2     | TTGGGAACCTCATCACC     | TCCCTTTCCATTTCCTCTC    |
| Solyc02g093580.2     | TGGTGCGAGTGTTACATTT   | AACCGTCGTGGCAATTAGAC   |
| Solyc09g082460.2     | CGTTCCTGTGTGGTTTCCT   | AAGCCACCCATTCTCTCTT    |
| Solyc09g097760.2     | CATCCAAGTGGCAGAACTCA  | CAATCTGGTCTAAAAGCAGCAA |
| Solyc12g006470.1     | GCCAGGTGAGACAGAAGAGG  | GTCCGCGATGAAAAGAATGT   |
| Solyc09g011540.2     | TGAATCGAATCCCGTCCTTA  | CTCACTGCATCCAAGCACAT   |
| Solyc03g120320.1     | AGGTCACGACGAGGAGAAAA  | ACGTGGAAGGATCGAATGAC   |
| Solyc10g054790.1     | TGGGAGAACTCCTAGGCTCA  | CACTGGAACAACCGCAAGTA   |
| Solyc04g071780.2     | CTTTTGCGGAGTCCAAACAT  | CCCTAAAGACCACGCGTTTA   |
| Solyc08g077910.2     | CTGATGGCAAAGGAACACCT  | ATAATGCCTCGTCCTTGCAC   |
| Solyc08g014000.2     | TGGTAGACCACCAACACGAA  | GGCATGTAATTCAGGGAGGA   |
| Solyc07g064600.2     | GCACTGGACATATCGTGGTG  | ATACCCGGCCATCAATATCA   |
| Solyc08g005630.2     | GCTGGAGCAGAAGAAATTGG  | TCCCATGTTTCTCCTTTTGG   |
| Solyc03g093540.1     | TCAAATTCCTCCGAAACAGAG | ACCAAACCTCGAGTCCCCTTT  |
| Solyc00g174340.1     | TCTTGTGAGGCCCAAAATTC  | CCAGCACCAGAATGAATCAA   |
| Solyc04g076860.2     | TGGTTTGCCCTGTTTGTAAAT | TTCTGATTGGGGTACTTGGA   |
| Solyc01g006540.2     | TGAAGCATTTTCAGCAGTGA  | ATCGGATACGACTGATTCCA   |
| Solyc11g011210.1     | GCTCAGCAACATCACACAAG  | ACAAGGGCATGATTGTTTGT   |
| Solyc03g031630.2     | CAATCCTTAGCTTCGTGGAA  | CCCTGCAACTCTTCAACAT    |
| Solyc01g099150.2     | ATCTCCCAAGTGAAACACCA  | TTTGTCTGGATCACCCAAGT   |
| Solyc03g095900.2     | GGGGTTTCTTTCAAGTGGTT  | ACCTTTTCCCAATATCTCG    |
| Solyc12g042600.1     | TGTGGATGGAACCTCGATCTT | CATACCACCCTTCACTCCTG   |
| Solyc08g077910.2     | ACACCTACTGGAGCTTGTGG  | TAACATGCACCACATCCAAC   |
| Solyc09g008170.1     | ATGAACCCTGAAGAGGAACC  | GCACGACAAGGAAATTGAAG   |
| Solyc07g040710.2     | TGTTTCTCGATGGGCTAGAG  | CATAACGATGTCGTGGATCA   |
| Solyc11g005330.1     | TACATGTTCAACCACCACTGC | TCTTTTCAATGGAGGAGCTG   |
| Solyc06g069430.2     | CCACAACAACCTGGACTCTCC | ACCTTGCTGCTGTGAAGAAC   |
| Solyc08g081170.2     | AACCCTTCATTTCCCTTCAC  | TCTGAGGGTGTGGGGTAGTA   |
| Solyc06g069520.2     | ATTCAGTGCTCAATCCCTTG  | GGGACCAACACCCAAGTAGT   |
| Solyc09g091020.2     | AGTGGAAGTTTGGACCATGA  | ATACAGCTTGTGCCCTGAAG   |

Table S2: Differential Expression of genes due to CO<sub>2</sub> stress (Fold change).

|          | Gene ID        | Annotation                                             | T1d3 :<br>CTd3 | T2d3 :<br>CTd3 | T1d7 :<br>CTd7 | T2d7 :<br>CTd7 |
|----------|----------------|--------------------------------------------------------|----------------|----------------|----------------|----------------|
| Group 1a | Solyc02g081330 | Phytoene synthase 2                                    | 0.29           | -              | 0.19           | -              |
|          | Solyc02g081390 | Amine oxidase family protein                           | 0.26           | 0.23           | 0.31           | -              |
|          | Solyc02g084840 | Dehydrin DHN1                                          | -              | -              | 10.46          |                |
|          | Solyc02g091700 | Hydroxyproline-rich glycoprotein                       | 0.23           | 0.13           | 0.32           | -              |
|          | Solyc07g040990 | Protein phosphatase 2C                                 | 0.46           | -              | -              | -              |
|          | Solyc07g043590 | Amine oxidase family protein                           | 0.39           | -              | 0.29           | -              |
|          | Solyc07g047790 | Chaperone protein htpG                                 | 7.84           | 2.35           | 4.81           | -              |
|          | Solyc08g078700 | Heat shock protein 22                                  | 127.79         | -              | 96.62          | -              |
|          | Solyc08g079180 | Elongation factor G                                    | -              | -              | 0.60           | -              |
|          | Solyc08g079430 | Primary amine oxidase                                  | -              | -              | 2.61           | -              |
|          | Solyc08g079830 | Cu/Zn-superoxide dismutase copper chaperone            | 0.49           | 0.33           | -              | -              |
|          | Solyc08g080190 | Choline dehydrogenase                                  | 0.03           | -              | 0.17           | -              |
|          | Solyc09g005620 | Glutaredoxin                                           | 0.43           | -              | 0.30           | -              |
|          | Solyc09g008770 | Group 3 late embryogenesis abundant protein            | 6.77           | -              | 5.28           | -              |
|          | Solyc09g009390 | Monodehydroascorbate reductase (NADH)-like protein     | 4.43           | -              | 4.00           | -              |
|          | Solyc09g010410 | BRI1-KD interacting protein 130                        | -              | -              | 1.88           | -              |
| Group 1b | Solyc02g086670 | Glycogen synthase kinase                               | 0.21           | 0.43           | 0.14           | 0.91           |
|          | Solyc02g087060 | Nodulin MtN21 family protein                           | 7.03           | 19.30          | -              | -              |
|          | Solyc02g087850 | Glutaredoxin family protein                            | -              | -              | -              | 0.27           |
|          | Solyc02g088630 | Glycosyltransferase                                    | -              | -              | 3.18           | 5.50           |
|          | Solyc02g089540 | Tomato CONSTANS-like 1                                 | -              | 1.94           | -              | 3.35           |
|          | Solyc02g090680 | Cyclin-dependent kinase inhibitor 7                    | -              | 23.44          | -              | -              |
|          | Solyc07g006500 | Alpha alpha-trehalose-phosphate synthase (UDP-forming) | -              | 0.41           | -              | -              |
|          | Solyc07g007120 | Homeobox protein knotted-1-like 3                      | 1.68           | 1.81           | -              | -              |
|          | Solyc07g008320 | Calcium-transporting ATPase 1                          | -              | 2.63           | -              | -              |
|          | Solyc09g007290 | Nuclear transcription factor Y subunit B-3             | -              | 0.68           | -              | -              |
|          | Solyc09g009190 | 1 4-alpha-glucan branching enzyme II                   | -              | 1.77           | -              | -              |
| Group c  | Solyc02g084240 | H1 histone-like protein                                | -              | 2.80           | -              | 0.47           |
|          | Solyc02g089620 | Proline dehydrogenase                                  | -              | -              | 1.94           | 0.45           |
|          | Solyc02g089900 | Receptor-like kinase                                   | -              | 0.40           | 4.06           | -              |

|  | Gene ID        | Annotation                                                               | T1d3 :<br>CTd3 | T2d3 :<br>CTd3 | T1d7 :<br>CTd7 | T2d7 :<br>CTd7 |
|--|----------------|--------------------------------------------------------------------------|----------------|----------------|----------------|----------------|
|  | Solyc02g090890 | Zeaxanthin epoxidase,<br>chloroplastic                                   | 6.63           | 16.54          | 0.46           | -              |
|  | Solyc02g093050 | WRKY transcription factor 26                                             | -              | 0.58           | 4.64           | -              |
|  | Solyc02g082760 | Catalase                                                                 | 0.43           | 0.43           | 0.33           | -              |
|  | Solyc07g005760 | Hydroxycinnamoyl CoA<br>shikimate/quinate<br>hydroxycinnamoyltransferase | 0.23           | 0.51           | 0.22           | -              |
|  | Solyc07g006890 | Cytochrome P450                                                          | 7.20           | 14.14          | 5.98           | -              |
|  | Solyc07g008310 | Rieske (2Fe-2S) domain protein                                           | 0.40           | 0.46           | 0.20           | -              |
|  | Solyc08g079100 | CRABS CLAW (Fragment)                                                    | -              | 13.21          | 7.17           | -              |
|  | Solyc08g082210 | Ethylene responsive<br>transcription factor 2b                           | 0.28           | 0.66           | 0.03           | -              |
|  | Solyc08g083130 | Homeobox leucine zipper<br>protein                                       | -              | 11.25          | 0.07           | -              |
|  | Solyc09g007850 | RNA-binding protein                                                      | 0.44           | 0.70           | 0.34           | -              |
|  | Solyc09g009040 | Delta14-sterol reductase                                                 | 2.48           | 2.39           | -              | -              |
|  | Solyc09g011240 | Reductase 2                                                              | -              | 1.89           | 7.24           | -              |

*All data shown in this table are statistically significant, "-" indicates statistically not significant.*
